# Supplementary material for: Elastic instabilities in planar elongational flow of monodisperse polymer solutions
Source: PubMed Central journal article supplement (PMC5018825; doi:10.1038/srep33029), 2016-09-12
Supplement: srep33029-s1.pdf [file srep33029-s1.pdf]

# Elastic instabilities in planar elongational flow of monodisperse polymer solutions

Simon J. Haward<sup>1,\*</sup>, Gareth H. McKinley<sup>2</sup>, and Amy Q. Shen<sup>1</sup>

<sup>1</sup>Okinawa Institute of Science and Technology, Onna-son, Okinawa, 904-0495, Japan

<sup>2</sup>Massachusetts Institute of Technology, 77 Massachusetts Avenue, Cambridge, MA 02139, United States

\*[simon.haward@oist.jp](mailto:simon.haward@oist.jp)

## Supplementary Information

### List of Video Captions

Movie 1 (M1.mov): Time-resolved flow velocimetry for flow of a 0.07 wt% solution of PS16 in DOP at  $Wi = 0.39$ ,  $Re = 0.019$ , and corresponding to the space-time data shown in Fig. 8(a) of the main article.

Movie 2 (M2.mov): Time-resolved flow velocimetry for flow of a 0.07 wt% solution of PS16 in DOP at  $Wi = 1.17$ ,  $Re = 0.058$ , and corresponding to the space-time data shown in Fig. 8(b) of the main article.

Movie 3 (M3.mov): Time-resolved flow velocimetry for flow of a 0.07 wt% solution of PS16 in DOP at  $Wi = 1.96$ ,  $Re = 0.10$ , and corresponding to the space-time data shown in Fig. 8(c) of the main article.

Movie 4 (M4.mov): Time-resolved flow velocimetry for flow of a 0.07 wt% solution of PS16 in DOP at  $Wi = 2.74$ ,  $Re = 0.14$ , and corresponding to the space-time data shown in Fig. 8(d) of the main article.
